# Supplementary material for: Respiratory muscle ultrasonography: methodology, basic and advanced principles and clinical applications in ICU and ED patients—a narrative review
Source: Springer Nature journal article supplement (doi:10.1007/s00134-019-05892-8), 2020-01-14
Supplement: MOESM2 [file 17671228]

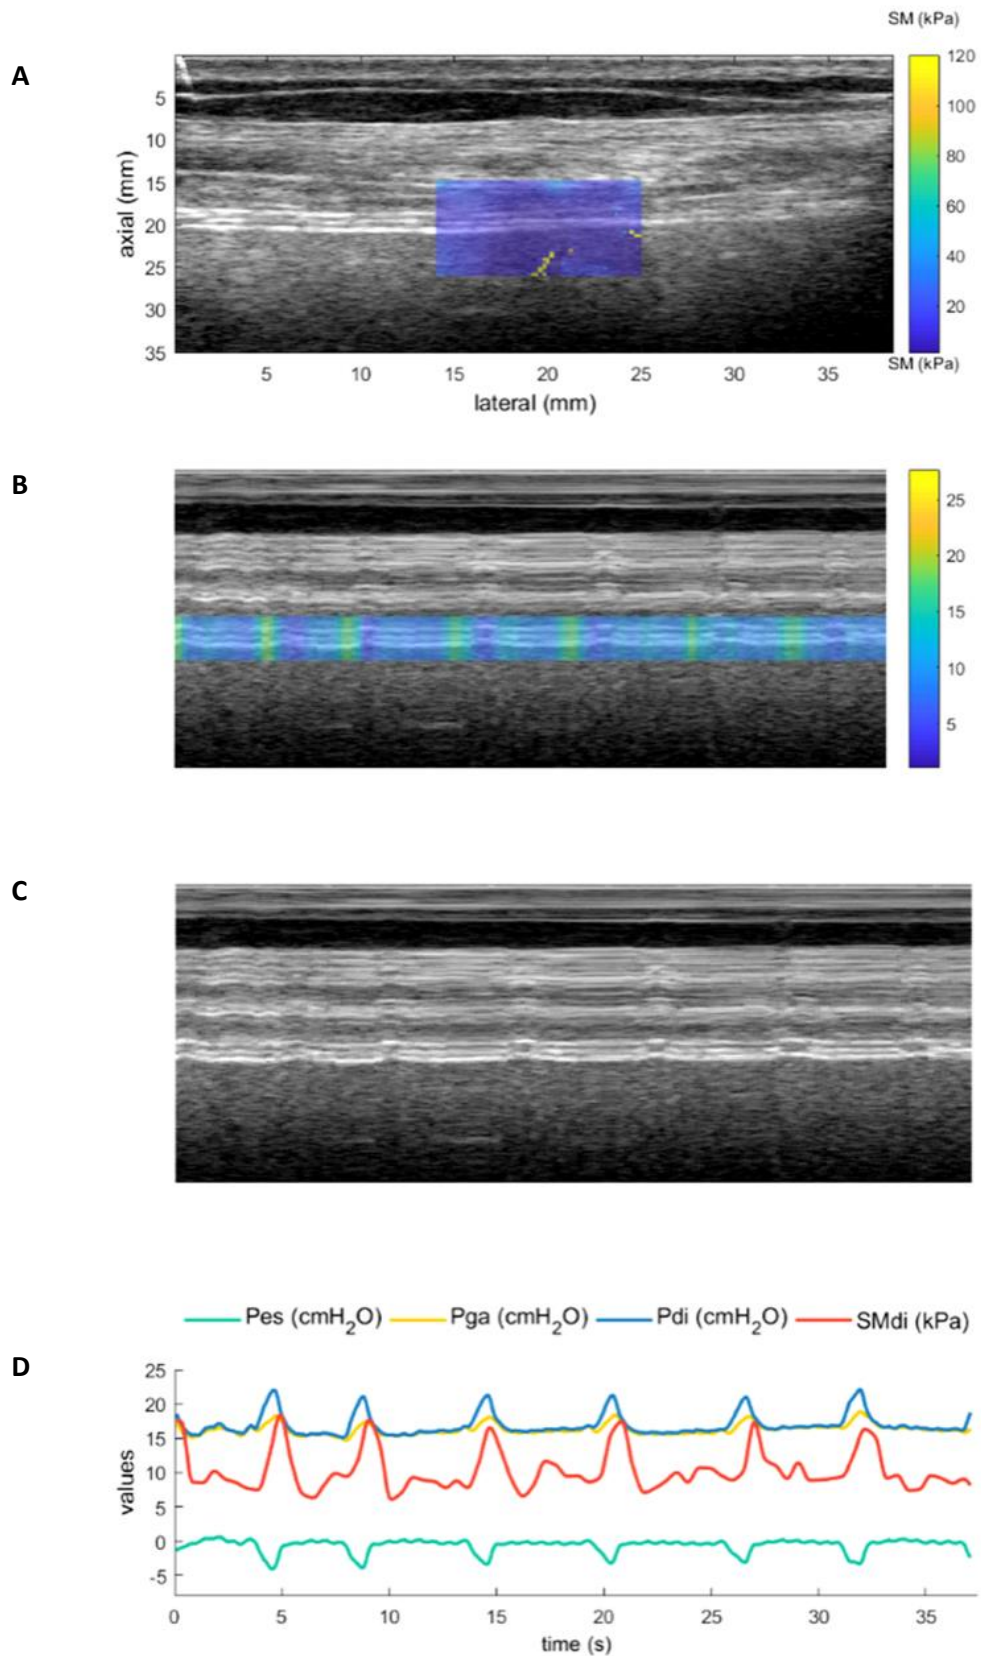

**OLS Figure E2. Shear wave elastography of the diaphragm.** A: B-mode image of the diaphragm with shear wave elastography overlay as a measure of muscle stiffness. B: M-mode image of the diaphragm. C: M-mode image of the diaphragm with shear wave elastography overlay. D: Esophageal pressure (Pes), gastric pressure (Pga), diaphragmatic pressure (Pdi) and shear modulus of the diaphragm (SMdi) during tidal breathing. Note that changes in Pdi and changes in SMdi follow the same pattern.
