# Supplementary material for: Respiratory muscle ultrasonography: methodology, basic and advanced principles and clinical applications in ICU and ED patients—a narrative review
Source: Springer Nature journal article supplement (doi:10.1007/s00134-019-05892-8), 2020-01-14
Supplement: MOESM3 [file 134_2019_5892_MOESM3_ESM.pdf]

# TIPS & TRICKS

## TO PERFORM RESPIRATORY MUSCLE ULTRASOUND IN ICU PATIENTS

### PATIENT POSITION

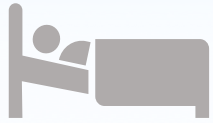

Diaphragm

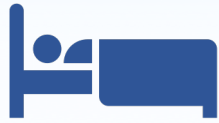

Diaphragm  
Expiratory muscles

Use same position for repeated measurements

### PROBE HANDLING

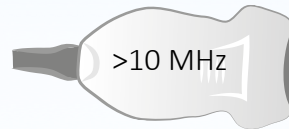

Muscle thickness  
B-mode

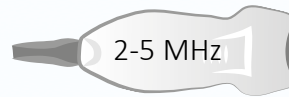

Diaphragm excursion  
M-mode

- Perpendicular to skin
- Mark probe location

### TIMING

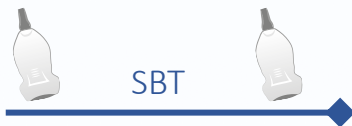

- Best during T-piece SBT
- Measurements at start and end of SBT can be compared

### VENTILATOR

#### Muscle thickness

- All settings, no NMBAs
- TFdi: SBT / low support

#### Diaphragm excursion

- No support
- No PEEP

### PATIENT COOPERATION

If patient can follow instructions:  
*Ask for a maximal breath*

### MEASUREMENTS

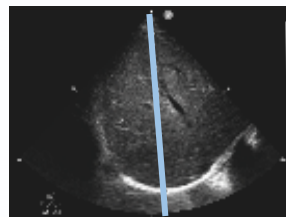

Diaphragm excursion  
M-line parallel to  
diaphragm movement

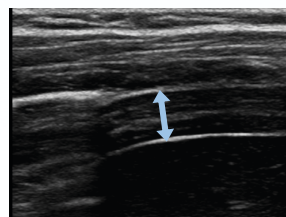

Thickness  
Calipers between fascia  
& perpendicular to  
fiber direction

### SYMMETRY

No asymmetric diaphragm dysfunction?  
*Right hemidiaphragm can be used as proxy  
for whole diaphragm*

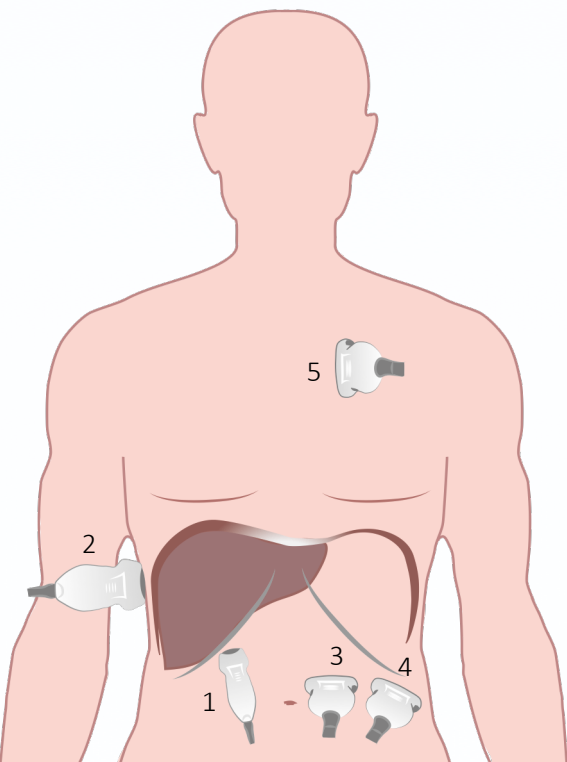

1. Diaphragm excursion; 2. Diaphragm thickness and TFdi; 3. Rectus abdominis;
4. External & internal oblique, transversus abdominis; 5. Parasternal intercostal
